# Supplementary material for: Acid-Triggered Switchable Near-Infrared/Shortwave Infrared Absorption and Emission of Indolizine-BODIPY Dyes
Source: MDPI journal article supplement (doi:10.3390/molecules28031287), 2023-01-29
Supplement: s1 [file s1]

# Supporting Information

## **Acid-Triggered                      Switchable                      Near-Infrared/Shortwave                      Infrared Absorption and Emission of Indolizine-BODIPY Dyes**

Matthew A. Saucier,<sup>1</sup> Cameron Smith,<sup>1</sup> Nicholas A. Kruse,<sup>1</sup> Nathan I. Hammer,<sup>1</sup> and Jared H. Delcamp<sup>1,2,3\*</sup>

1 Department of Chemistry and Biochemistry, University of Mississippi, University, Mississippi 38677

2 Current Address: Materials and Manufacturing Directorate, Air Force Research Laboratory, 2230 Tenth Street Area B Building 655, Wright-Patterson AFB, OH 45433, USA

3 Current Address: UES, Inc., 4401 Dayton Xenia Rd, Dayton, OH 45432, USA

\* Correspondence: [delcamp@olemiss.edu](mailto:delcamp@olemiss.edu); [jared.delcamp.ctr@us.af.mil](mailto:jared.delcamp.ctr@us.af.mil)

## Table of Contents

|                                                                                                                        |    |
|------------------------------------------------------------------------------------------------------------------------|----|
| NMR spectra for new compounds .....                                                                                    | 3  |
| <b>Figure S1.</b> $^1\text{H}$ -NMR (400 MHz, $\text{CDCl}_3$ ) of <b>1Ph-CHO</b> . ....                               | 3  |
| <b>Figure S2.</b> $^{13}\text{C}$ -NMR (101 MHz, $\text{CDCl}_3$ ) of <b>1Ph-CHO</b> . ....                            | 3  |
| <b>Figure S3.</b> ESI-HRMS spectrum of <b>1Ph-CHO</b> .....                                                            | 4  |
| <b>Figure S4.</b> $^1\text{H}$ -NMR (300 MHz, $\text{DMSO}-d_6$ ) of <b>2Ph</b> . ....                                 | 5  |
| <b>Figure S5.</b> $^{19}\text{F}$ -NMR (376 MHz, $\text{DMSO}-d_6$ ) of <b>2Ph</b> . ....                              | 5  |
| <b>Figure S6.</b> $^{11}\text{B}$ NMR (128 MHz, $\text{DMSO}-d_6$ ) of <b>2Ph</b> . ....                               | 6  |
| <b>Figure S7.</b> ESI-HRMS spectrum of <b>2Ph</b> .....                                                                | 6  |
| <b>Figure S8.</b> $^1\text{H}$ -NMR (400 MHz, $\text{DMSO}-d_6$ ) of <b>1Ph</b> ....                                   | 7  |
| <b>Figure S9.</b> $^{19}\text{F}$ -NMR (376 MHz, $\text{DMSO}-d_6$ ) of <b>1Ph</b> . ....                              | 7  |
| <b>Figure S10.</b> $^{11}\text{B}$ -NMR (128 MHz, $\text{DMSO}-d_6$ ) of <b>1Ph</b> .....                              | 8  |
| <b>Figure S11.</b> ESI-HRMS spectrum of <b>1Ph</b> .....                                                               | 9  |
| Computational studies of BODIPY dyes .....                                                                             | 10 |
| <b>Table S1.</b> Tabulated computational data .....                                                                    | 10 |
| Photophysical studies of BODIPY dyes.....                                                                              | 11 |
| <b>Figure S12.</b> Solution stability studies .....                                                                    | 11 |
| <b>Figure S13.</b> Absorption spectra of <b>DMA-TFA</b> over 4 d.....                                                  | 11 |
| <b>Figure S14.</b> Absorption spectra of <b>2Ph-TFA</b> over 4 d .....                                                 | 12 |
| <b>Figure S15.</b> Absorption spectra of <b>1Ph-TFA</b> over 4 d .....                                                 | 12 |
| <b>Figure S16.</b> Absorption of <b>DMA</b> , <b>DMA-TFA</b> , and <b>DMA-TFA-TEA</b> .....                            | 13 |
| <b>Figure S17.</b> Absorption of <b>2Ph</b> , <b>2Ph-TFA</b> , and <b>2Ph-TFA-TEA</b> .....                            | 13 |
| <b>Figure S18.</b> Absorption spectra of <b>2Ph</b> , <b>2Ph-TFA</b> , and <b>2Ph-AcOH</b> .....                       | 14 |
| <b>Figure S19.</b> Absorption spectra of <b>1Ph</b> , <b>1Ph-TFA</b> , and <b>1Ph-AcOH</b> .....                       | 14 |
| <b>Figure S20.</b> Full spectrum UV-Vis-NIR absorption and emission for <b>DMA</b> , <b>2Ph</b> , and <b>1Ph</b> ..... | 15 |

# NMR spectra for new compounds

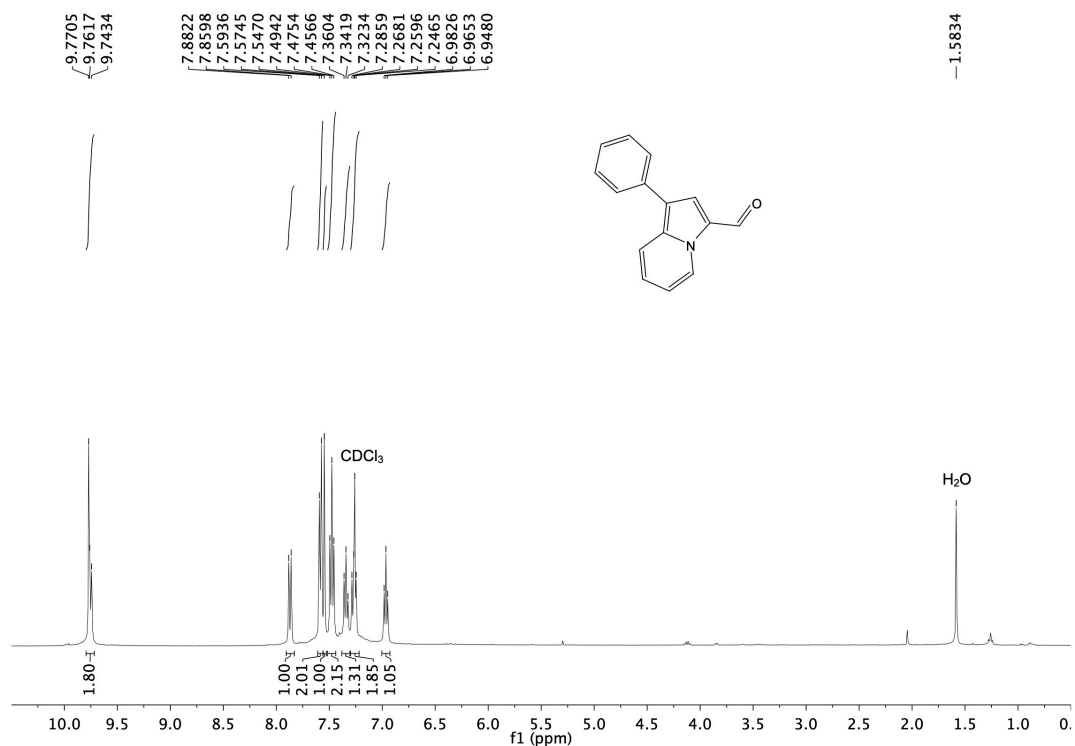

Figure S1. <sup>1</sup>H-NMR (400 MHz, CDCl<sub>3</sub>) of 1Ph-CHO.

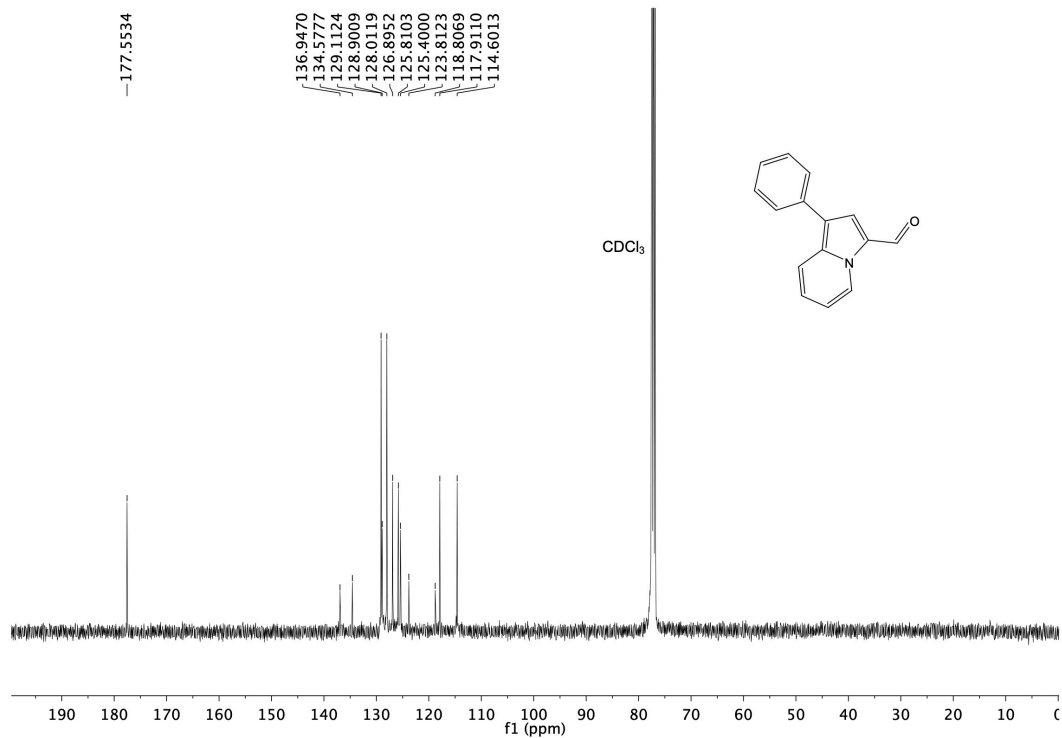

Figure S2. <sup>13</sup>C-NMR (101 MHz, CDCl<sub>3</sub>) of 1Ph-CHO.

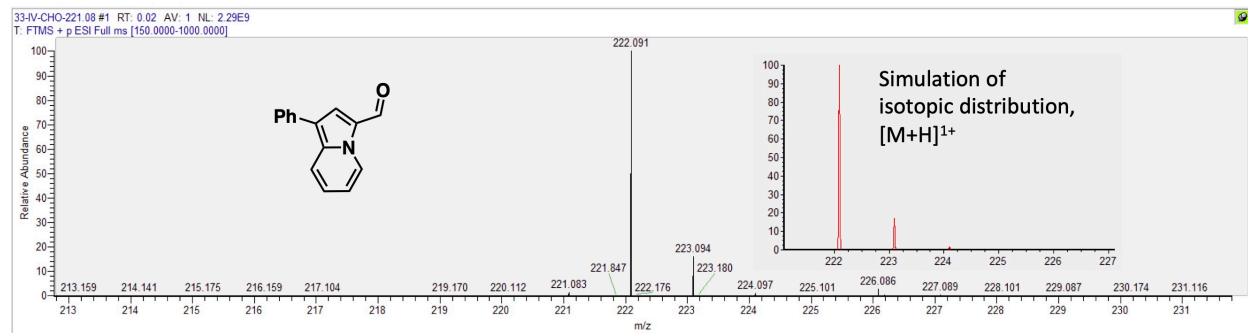

**Figure S3.** ESI-HRMS spectrum of **1Ph-CHO**, with an insert of the simulated spectrum for  $[M+H]^{1+}$ .



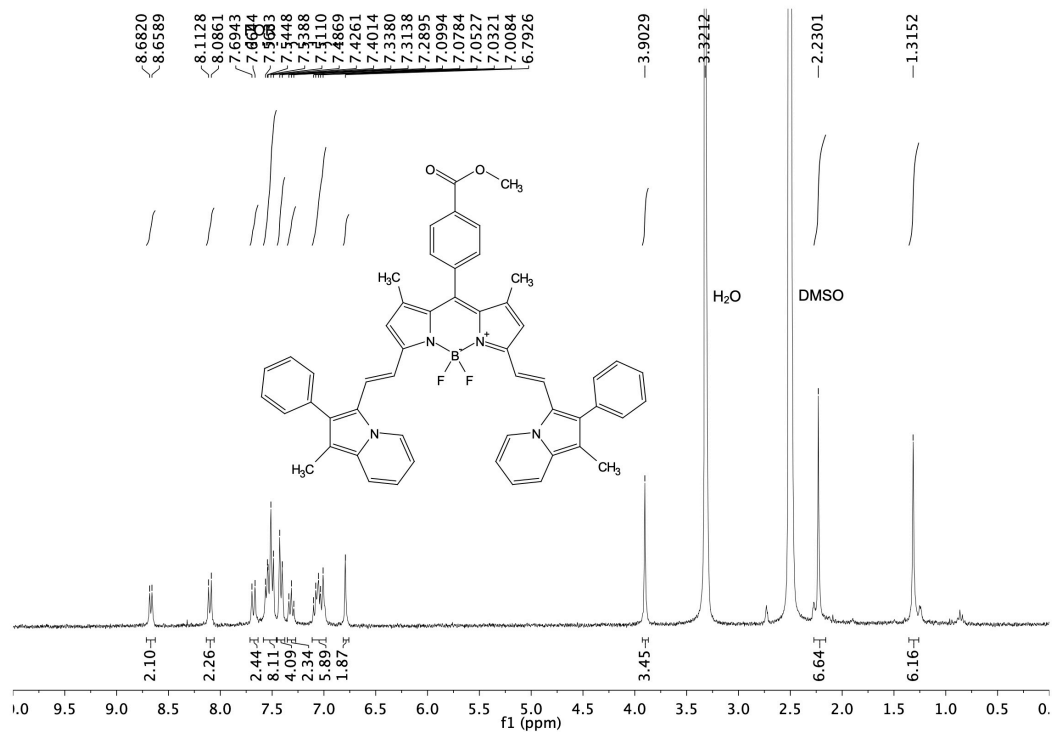

**Figure S4.** <sup>1</sup>H-NMR (300 MHz, DMSO-*d*<sub>6</sub>) of **2Ph**.

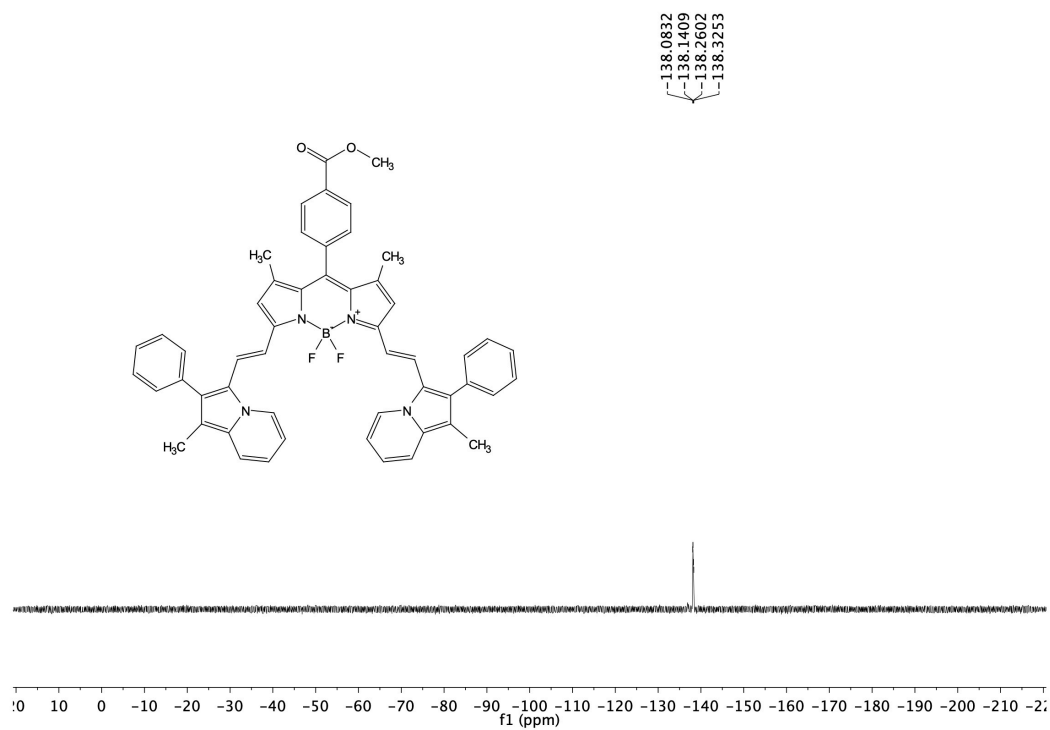

**Figure S5.** <sup>19</sup>F-NMR (376 MHz, DMSO-*d*<sub>6</sub>) of **2Ph**.

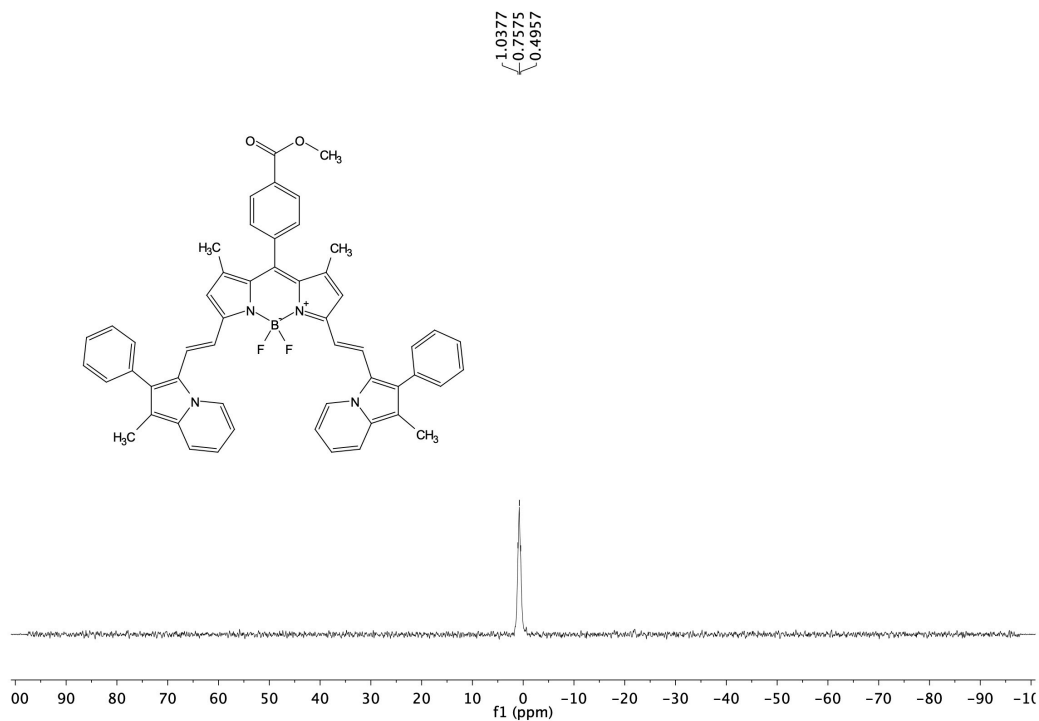

**Figure S6.**  $^{11}\text{B}$  NMR (128 MHz,  $\text{DMSO}-d_6$ ) of **2Ph**, recorded in a quartz NMR tube.

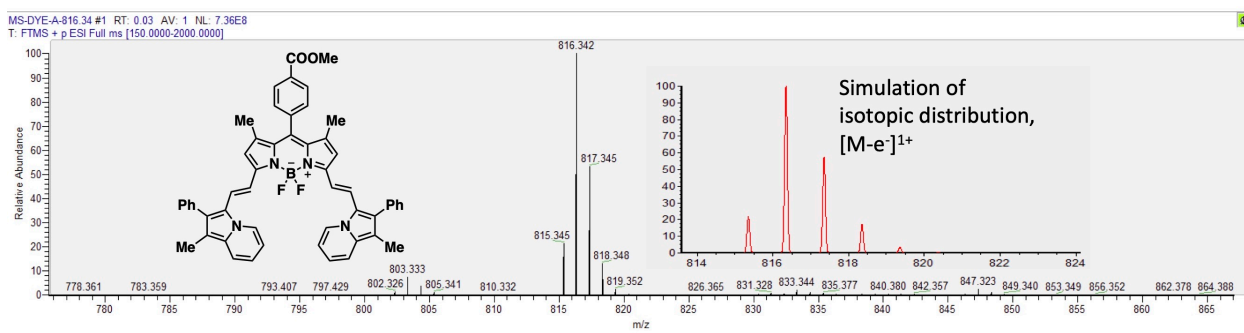

**Figure S7.** ESI-HRMS spectrum of **2Ph**, with simulated spectrum for  $[\text{M}-e]^{1+}$  in inset.

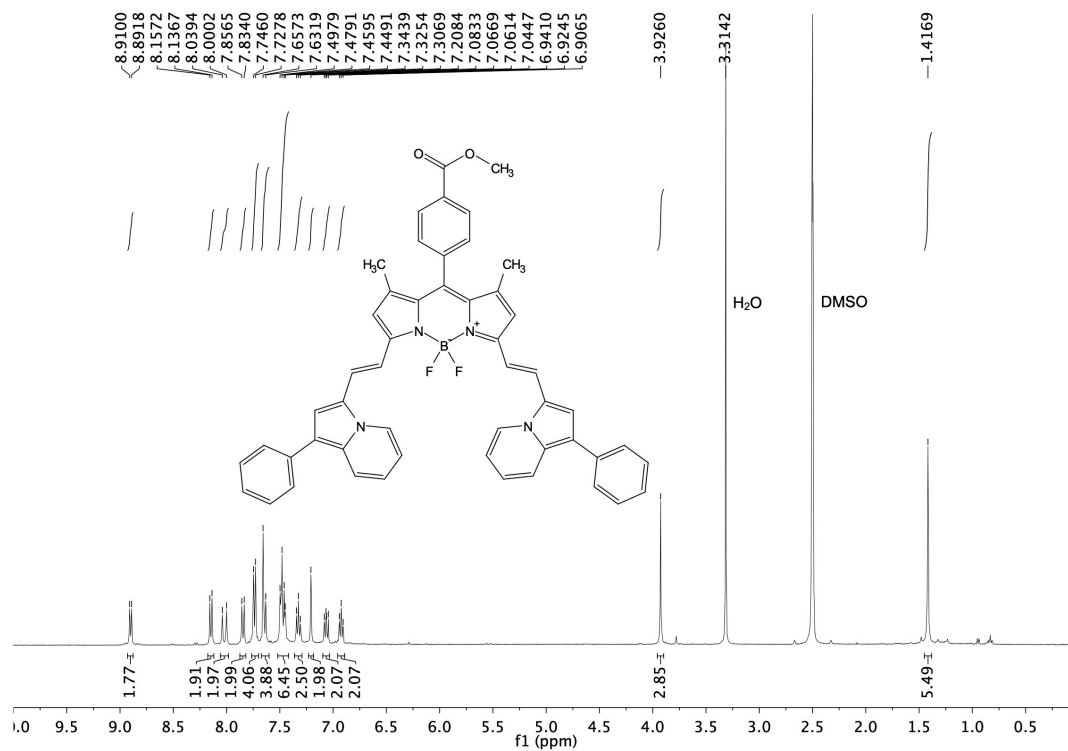

**Figure S8.** <sup>1</sup>H-NMR (400 MHz, DMSO-*d*<sub>6</sub>) of **1Ph**.

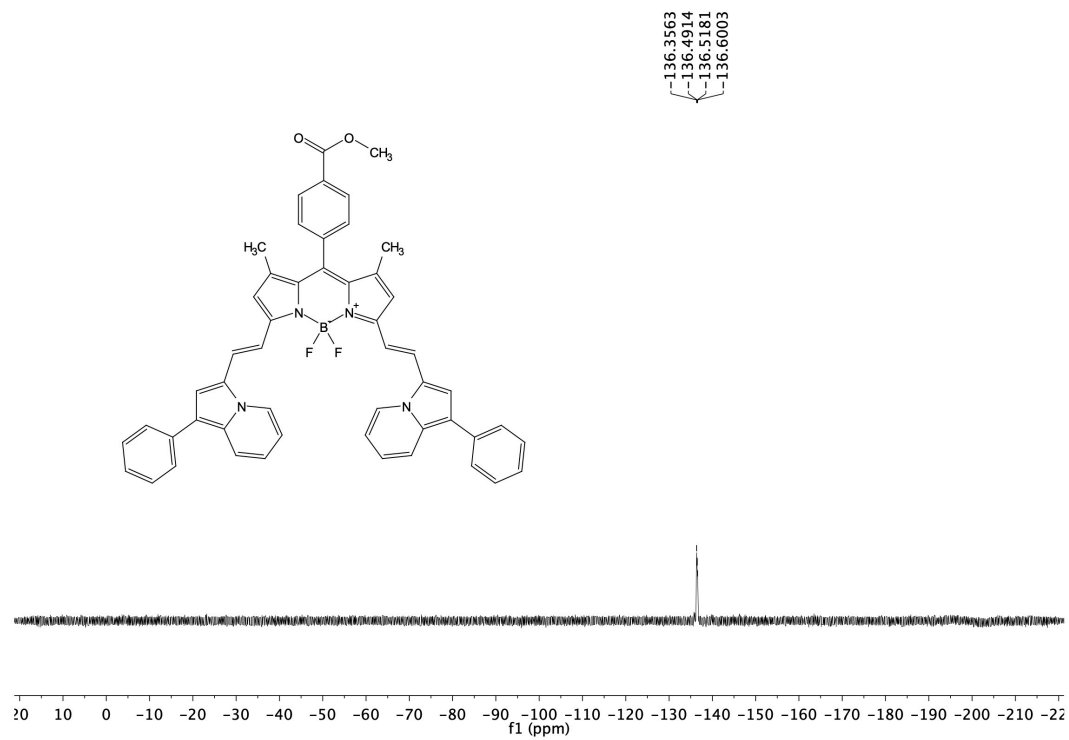

**Figure S9.** <sup>19</sup>F-NMR (376 MHz, DMSO-*d*<sub>6</sub>) of **1Ph**.

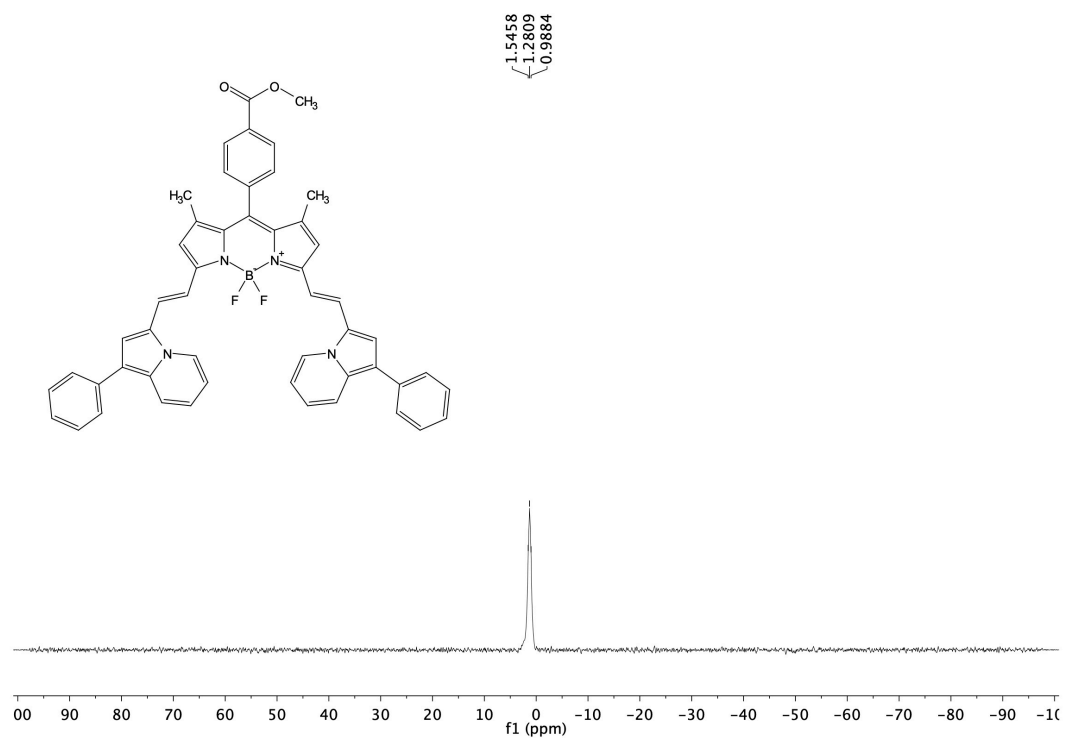

**Figure S10.**  $^{11}\text{B}$ -NMR (128 MHz,  $\text{DMSO}-d_6$ ) of **1Ph**, recorded in a quartz NMR tube.

EXPERIMENTAL

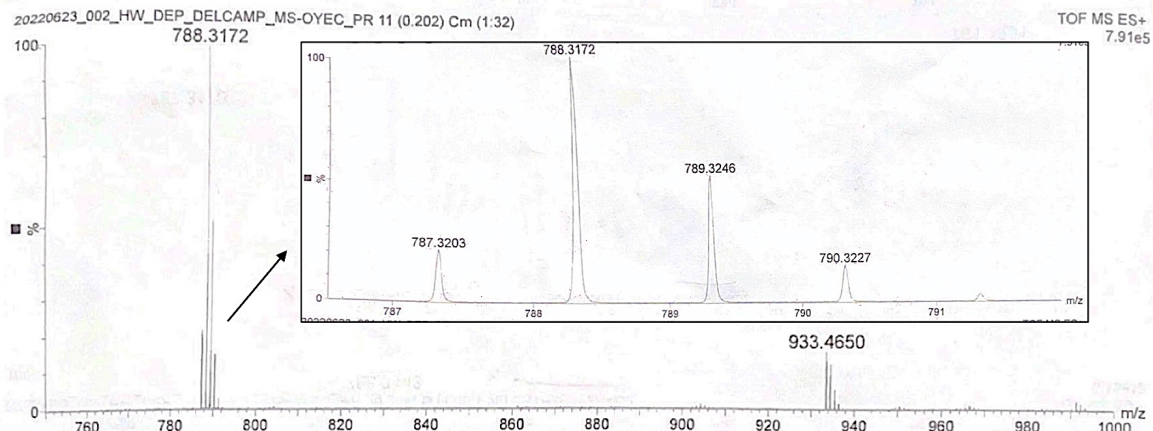

THEORETICAL  
SIMULATION

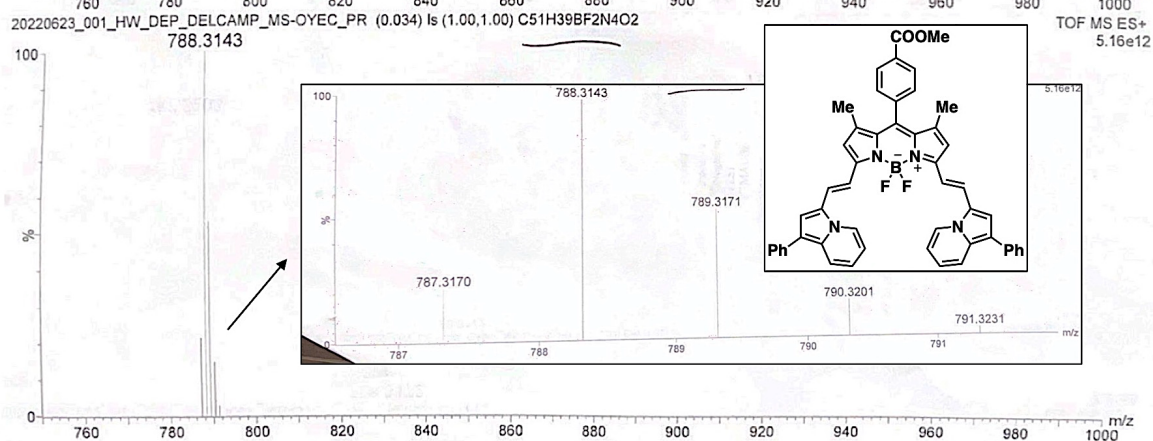

**Figure S11.** ESI-HRMS spectrum of **1Ph**, with simulated spectrum for  $[M-e]^{1+}$  below the experimental spectrum. The M ion peaks are enlarged in the inset.

## Computational studies of BODIPY dyes

**Table S1.** Tabulated computational data from TD-DFT of optimized geometries at the B3LYP/6-311G(d,p) level of theory with dichloromethane implicit solvation. Data from the lowest energy transition (i.e. HOMO to LUMO).

| Dye            | HOMO (eV) | LUMO (eV) | Transition            | Contribution | Vertical Transition (nm   eV) |      | Oscillator Strength |
|----------------|-----------|-----------|-----------------------|--------------|-------------------------------|------|---------------------|
| <b>DMA</b>     | -4.73     | -2.78     | $S_0 \rightarrow S_1$ | 100%         | 708                           | 1.75 | 1.0969              |
| <b>2Ph</b>     | -4.68     | -2.82     | $S_0 \rightarrow S_1$ | 100%         | 765                           | 1.62 | 0.8856              |
| <b>1Ph</b>     | -4.77     | -2.89     | $S_0 \rightarrow S_1$ | 100%         | 761                           | 1.63 | 0.8591              |
| <b>1Ph-TFA</b> | -5.51     | -4.02     | $S_0 \rightarrow S_1$ | 101%         | 954                           | 1.30 | 0.5789              |

### Photophysical studies of BODIPY dyes

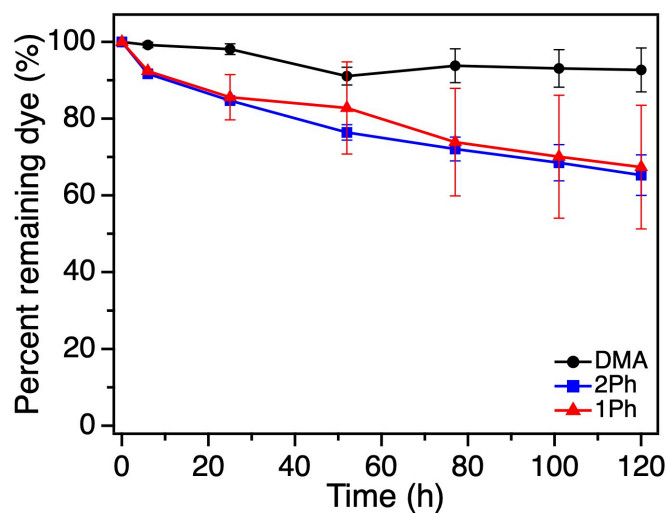

**Figure S12.** Solution stability studies. Percent of original absorption value of  $\lambda_{\max}^{\text{abs}}$  for the three BODIPY dyes (**DMA** = 710 nm, **2Ph** = 801 nm, **1Ph** = 798 nm) in a sealed tube with DCE, in the dark, under ambient atmosphere, and at room temperature. Each experiment was run in duplicate with error bars reflecting the standard deviation from the average.

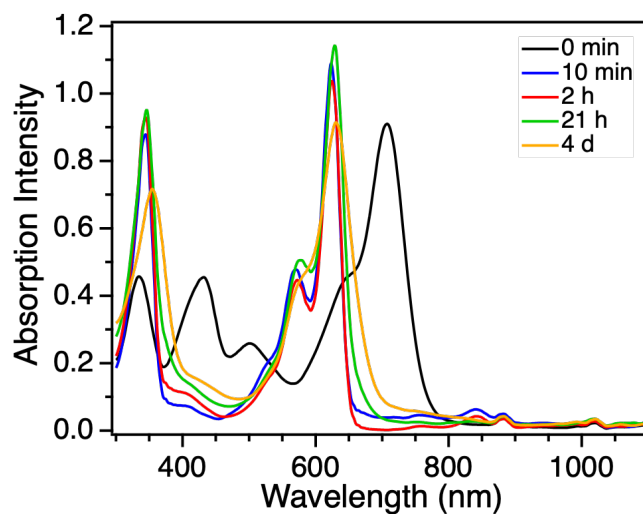

**Figure S13.** Absorption spectra of **DMA-TFA** over 4 d (ca. 10  $\mu\text{M}$  dye in  $\text{CH}_2\text{Cl}_2$  with 1% TFA [v/v]).

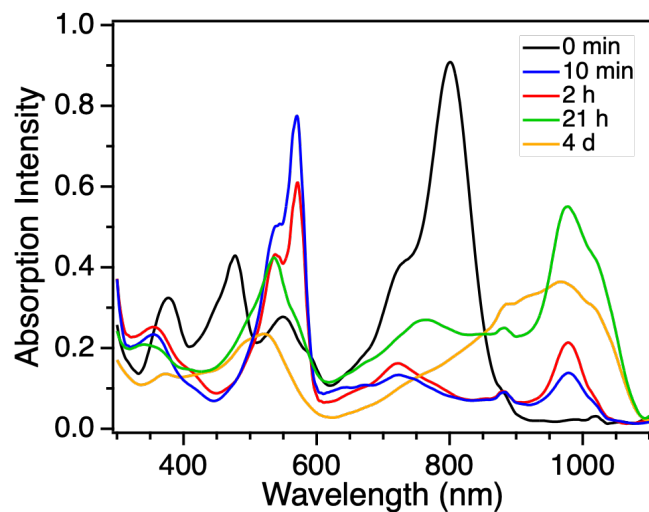

**Figure S14.** Absorption spectra of **2Ph-TFA** over 4 d (ca. 10  $\mu$ M dye in  $\text{CH}_2\text{Cl}_2$  with 1% TFA [v/v]).

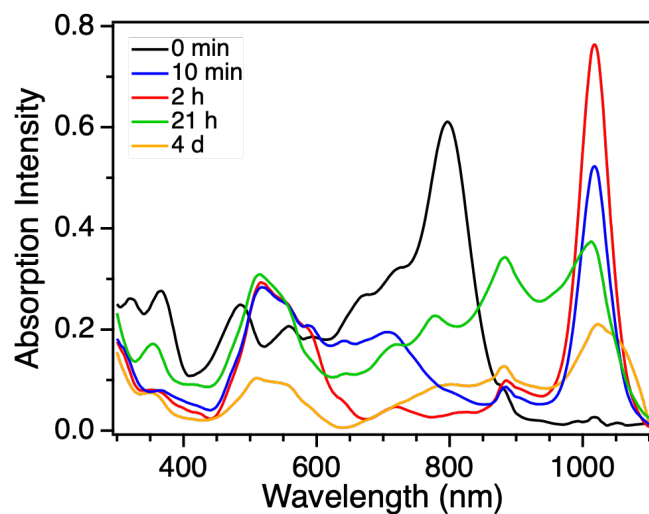

**Figure S15.** Absorption spectra of **1Ph-TFA** over 4 d (ca. 10  $\mu$ M dye in  $\text{CH}_2\text{Cl}_2$  with 1% TFA [v/v]).



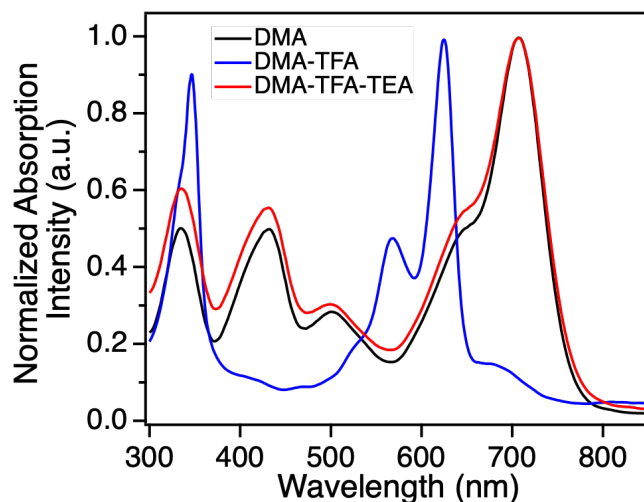

**Figure S16.** Absorption of **DMA**, **DMA-TFA**, and **DMA-TFA-TEA**. **DMA** was dissolved in DMSO- $d_6$  solution (ca. 3 mM), then 4,000 equiv. TFA was added and mixed thoroughly, then 4,000 equiv. TEA was added and mixed thoroughly. A small sample of each solution was taken and diluted with  $\text{CH}_2\text{Cl}_2$  to produce the absorption spectrum.

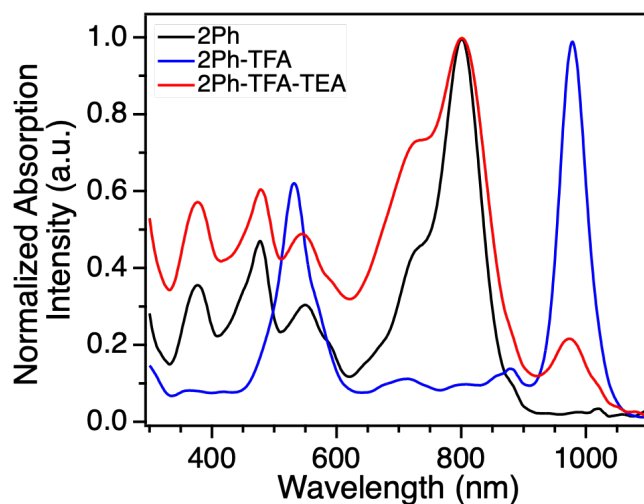

**Figure S17.** Absorption of **2Ph**, **2Ph-TFA**, and **2Ph-TFA-TEA**. **2Ph** was dissolved in DMSO- $d_6$  solution (ca. 3 mM), then 4,000 equiv. TFA was added and mixed thoroughly, then 4,000 equiv. TEA was added and mixed thoroughly. A small sample of each solution was taken and diluted with  $\text{CH}_2\text{Cl}_2$  to produce the absorption spectrum.

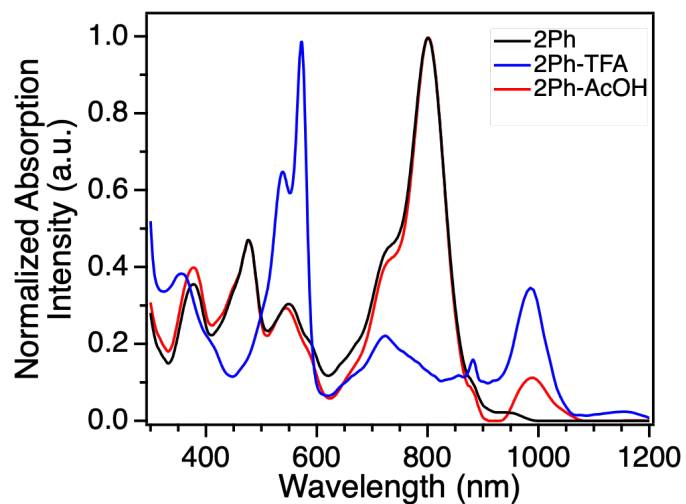

**Figure S18.** Absorption spectra of **2Ph** ( $\text{CH}_2\text{Cl}_2$ ), **2Ph-TFA** ( $\text{CH}_2\text{Cl}_2$  with 1% TFA [v/v]), and **2Ph-AcOH** ( $\text{CH}_2\text{Cl}_2$  with 1% AcOH [v/v]) all after 2 h.

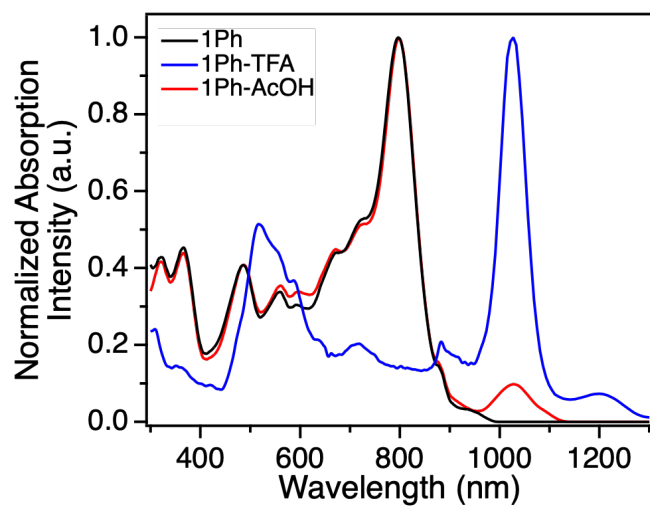

**Figure S19.** Absorption spectra of **1Ph** ( $\text{CH}_2\text{Cl}_2$ ), **1Ph-TFA** ( $\text{CH}_2\text{Cl}_2$  with 1% TFA [v/v]), and **1Ph-AcOH** ( $\text{CH}_2\text{Cl}_2$  with 1% AcOH [v/v]) all after 2 h.

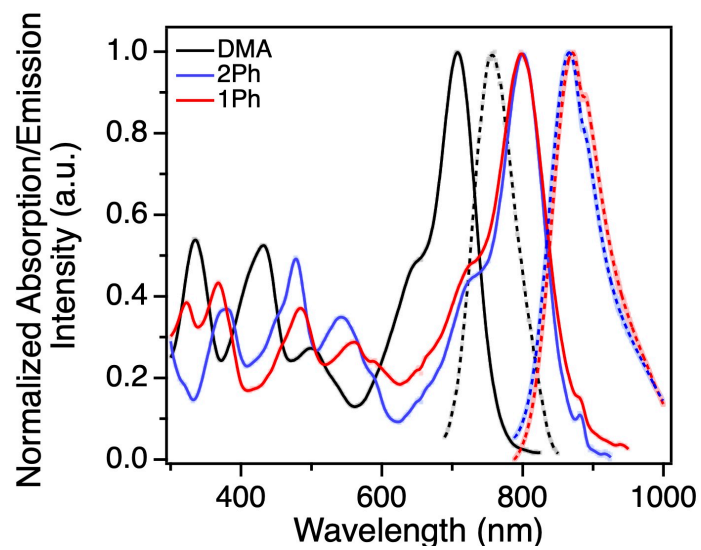

**Figure S20.** Full spectrum UV-Vis-NIR absorption and emission curves for the three BODIPY dyes (**DMA**, **2Ph**, and **1Ph**) in  $\text{CH}_2\text{Cl}_2$ .
